# Supplementary material
Source: HighWire-hosted journal article supplement (http://molpharm.aspetjournals.org/highwire/filestream/76746/field_highwire_adjunct_files/0/MOL52357_sup_data.pdf)
Supplement: MOL52357_sup_data.pdf [file MOL52357_sup_data.pdf]

# Lithium Increases Synapse Formation between Hippocampal Neurons by Depleting Phosphoinositides

Hee Jung Kim and Stanley A. Thayer

Molecular Pharmacology

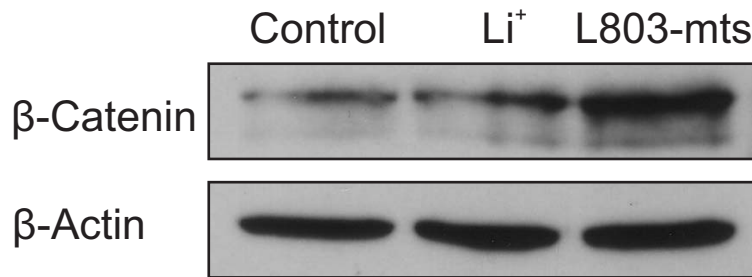

Supplemental Fig. 1. Beta-catenin levels in rat hippocampal cultures are up-regulated by lithium and L803-mts. Cells were treated with 5 mM Lithium or 40  $\mu\text{M}$  L803-mts for 4 hr. Cell lysates were subjected to SDS-polyacrylamide gel electrophoresis followed by immunoblot analysis using antibodies against  $\beta$ -catenin (Santa Cruz, 1:1000) and  $\beta$ -actin (Santa Cruz, 1:1000) as indicated.
